# Supplementary figures and images for: Seasonal variation of pharmaceutical concentrations in a river/lake system in Eastern Finland
Source: Royal Society of Chemistry journal article supplement (doi:10.1039/c5em00505a), 2016-01-01

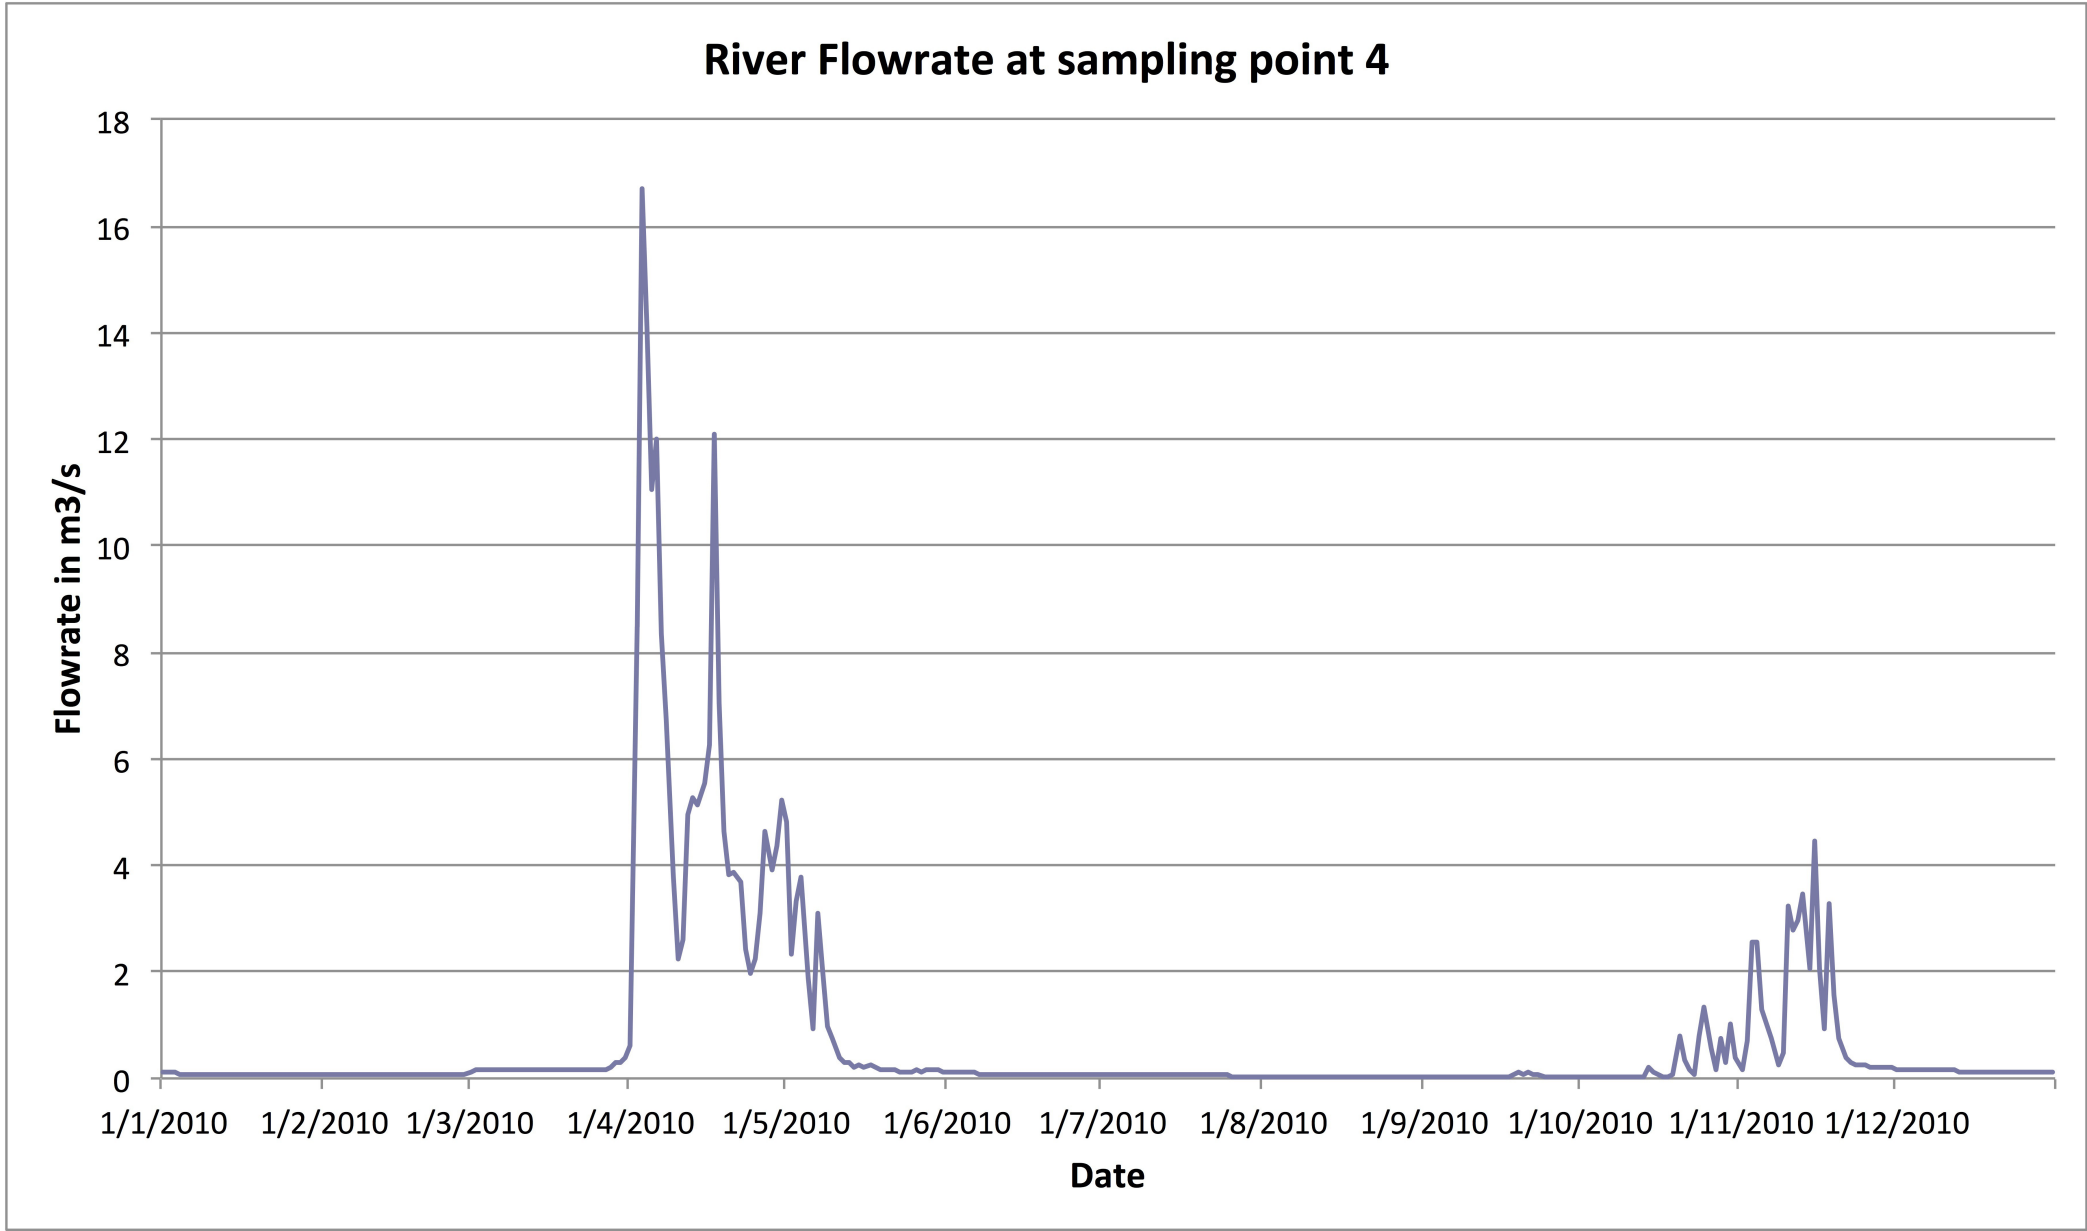

Supplement: c5em00505a2.pdf [file c5em00505a2.pdf]
